# Supplementary material for: Endo/exo binding of alkyl and aryl diammonium ions by cyclopentanocucurbit[6]uril
Source: Royal Society of Chemistry journal article supplement (doi:10.1039/c7qo00376e), 2017-01-01
Supplement: c7qo00376e1.pdf [file c7qo00376e1.pdf]

## Electronic Supplementary Information (ESI)

### Endo/exo binding of alkyl and aryl diammonium ions by cyclopentanocucurbit[6]uril

*Yun-Xia Qu<sup>a</sup>, Rui-Lian Lin<sup>b</sup>, Yun-Qian Zhang<sup>a</sup>, Kai-Zhi Zhou<sup>a</sup>, Qing-Di Zhou<sup>c</sup>, Qian-Jiang Zhu<sup>a</sup>, Zhu Tao<sup>a</sup>, Pei-Hua Ma<sup>\*,a</sup>, Jing-Xin Liu<sup>\*,b</sup> and Gang Wei<sup>\*,c</sup>*

---

**a** Y.-X. Qu, Y.-Q. Zhang, K.-Z. Zhou, Q.-J. Zhu, Z. Tao, P.-H. Ma

Key Laboratory of Macrocyclic and Supramolecular Chemistry of Guizhou Province, Guizhou University, Guiyang 550025, China

[phma@gzu.edu.cn](mailto:phma@gzu.edu.cn)

**b** R.-L. Lin, J.-X. Liu

College of Chemistry and Chemical Engineering, Anhui University of Technology, Maanshan 243002, China

[jxliu411@ahut.edu.cn](mailto:jxliu411@ahut.edu.cn)

**c** Q.-D. Zhou, G. Wei

Commonwealth Scientific and Industrial Research Organization (CSIRO), Manufacturing, P.O. Box 218, Lindfield, NSW 2070, Australia

[gang.wei@csiro.au](mailto:gang.wei@csiro.au)

### Table of Contents

|                                                                                 |          |
|---------------------------------------------------------------------------------|----------|
| <b>S1. Crystallographic Information.....</b>                                    | <b>2</b> |
| <b>S2. Copies of 2D NOESY NMR Spectra .....</b>                                 | <b>3</b> |
| <b>S3. Structural comparion of normal and deformed CyP<sub>6</sub>Q[6].....</b> | <b>4</b> |

## S1. Crystallographic Information:

CCDC 1511433, 1534795, 1511619, 1511458 and 1554031 contain the supplementary crystallographic data for this paper. The data can be obtained free of charge via [www.ccdc.cam.ac.uk/data\\_request/cif](http://www.ccdc.cam.ac.uk/data_request/cif) (or from The Cambridge Crystallographic Data Centre, 12, Union Road, Cambridge CB2 1EZ, UK; fax: +44 1223 336 033; e-mail: deposit@ccdc.cam.ac.uk).

**Table 1.** The Crystallographic data for compounds **2**, **3**, **4** and **7**.

| compound                                              | <b>2</b>                                                                                        | <b>3</b>                                                                                         | <b>4</b>                                                                                         | <b>7</b>                                                                                        | <b>8</b>                                                                                          |
|-------------------------------------------------------|-------------------------------------------------------------------------------------------------|--------------------------------------------------------------------------------------------------|--------------------------------------------------------------------------------------------------|-------------------------------------------------------------------------------------------------|---------------------------------------------------------------------------------------------------|
| Formula                                               | C <sub>58</sub> H <sub>94</sub> N <sub>26</sub> O <sub>22</sub> Zn <sub>2</sub> Cl <sub>8</sub> | C <sub>60</sub> H <sub>112</sub> N <sub>26</sub> O <sub>28</sub> Zn <sub>2</sub> Cl <sub>8</sub> | C <sub>62</sub> H <sub>106</sub> N <sub>26</sub> O <sub>24</sub> Zn <sub>2</sub> Cl <sub>8</sub> | C <sub>60</sub> H <sub>90</sub> N <sub>26</sub> O <sub>22</sub> Zn <sub>2</sub> Cl <sub>8</sub> | C <sub>62</sub> H <sub>108</sub> N <sub>26</sub> O <sub>28</sub> Zn <sub>2</sub> Cl <sub>10</sub> |
| <i>M<sub>r</sub></i>                                  | 1921.93                                                                                         | 2131.00                                                                                          | 2014.07                                                                                          | 1941.92                                                                                         | 2150.98                                                                                           |
| crystal system                                        | Triclinic                                                                                       | Triclinic                                                                                        | Monoclinic                                                                                       | Monoclinic                                                                                      | Triclinic                                                                                         |
| space group                                           | <i>P</i> -1                                                                                     | <i>P</i> -1                                                                                      | <i>C</i> 2/ <i>c</i>                                                                             | <i>C</i> 2/ <i>c</i>                                                                            | <i>P</i> -1                                                                                       |
| <i>a</i> (Å)                                          | 12.2894(18)                                                                                     | 12.298(3)                                                                                        | 29.3492(15)                                                                                      | 27.520(3)                                                                                       | 12.315(4)                                                                                         |
| <i>b</i> (Å)                                          | 12.4667(17)                                                                                     | 12.903(3)                                                                                        | 12.5025(6)                                                                                       | 17.250(3)                                                                                       | 12.875(4)                                                                                         |
| <i>c</i> (Å)                                          | 14.986(2)                                                                                       | 15.662(3)                                                                                        | 25.3876(13)                                                                                      | 18.358(3)                                                                                       | 15.525(6)                                                                                         |
| <i>α</i> (deg)                                        | 73.289(4)                                                                                       | 75.259(3)                                                                                        | 90                                                                                               | 90                                                                                              | 75.131(11)                                                                                        |
| <i>β</i> (deg)                                        | 84.747(4)                                                                                       | 70.211(3)                                                                                        | 113.650(3)                                                                                       | 94.006(7)                                                                                       | 70.361(11)                                                                                        |
| <i>γ</i> (deg)                                        | 62.451(4)                                                                                       | 76.684(3)                                                                                        | 90                                                                                               | 90                                                                                              | 77.820(10)                                                                                        |
| <i>V</i> (Å <sup>3</sup> )                            | 1947.3(5)                                                                                       | 2233.0(8)                                                                                        | 8533.3(7)                                                                                        | 8694(2)                                                                                         | 2219.6(14)                                                                                        |
| <i>Z</i>                                              | 1                                                                                               | 1                                                                                                | 4                                                                                                | 4                                                                                               | 1                                                                                                 |
| <i>D<sub>c</sub></i> (g·cm <sup>-3</sup> )            | 1.639                                                                                           | 1.585                                                                                            | 1.568                                                                                            | 1.484                                                                                           | 1.609                                                                                             |
| <i>μ</i> (mm <sup>-1</sup> )                          | 0.981                                                                                           | 0.926                                                                                            | 0.901                                                                                            | 0.879                                                                                           | 0.933                                                                                             |
| Data/params                                           | 6969 / 478                                                                                      | 8767 / 505                                                                                       | 6530 / 505                                                                                       | 7894 / 497                                                                                      | 7854 / 550                                                                                        |
| <i>θ</i> (deg)                                        | 1.42 - 25.27                                                                                    | 1.41 - 26.00                                                                                     | 1.75 - 25.00                                                                                     | 1.39 - 25.59                                                                                    | 1.42 - 25.10                                                                                      |
| <i>GOF</i>                                            | 1.003                                                                                           | 1.007                                                                                            | 1.006                                                                                            | 1.009                                                                                           | 1.003                                                                                             |
| Final <i>R</i> indices<br>[ <i>I</i> > 2( <i>I</i> )] | <i>R</i> <sub>1</sub> = 0.0529<br><i>wR</i> <sub>2</sub> = 0.1427                               | <i>R</i> <sub>1</sub> = 0.0576<br><i>wR</i> <sub>2</sub> = 0.1827                                | <i>R</i> <sub>1</sub> = 0.0743<br><i>wR</i> <sub>2</sub> = 0.2376                                | <i>R</i> <sub>1</sub> = 0.0685<br><i>wR</i> <sub>2</sub> = 0.1991                               | <i>R</i> <sub>1</sub> = 0.0836<br><i>wR</i> <sub>2</sub> = 0.2457                                 |
| <i>R</i> indices<br>(all data)                        | <i>R</i> <sub>1</sub> = 0.0758<br><i>wR</i> <sub>2</sub> = 0.1547                               | <i>R</i> <sub>1</sub> = 0.0667<br><i>wR</i> <sub>2</sub> = 0.1918                                | <i>R</i> <sub>1</sub> = 0.0863<br><i>wR</i> <sub>2</sub> = 0.2487                                | <i>R</i> <sub>1</sub> = 0.1061<br><i>wR</i> <sub>2</sub> = 0.2199                               | <i>R</i> <sub>1</sub> = 0.1104<br><i>wR</i> <sub>2</sub> = 0.2745                                 |

## S2. 2D NOESY NMR of the guests 7 complexed with CyP<sub>6</sub>Q[6].

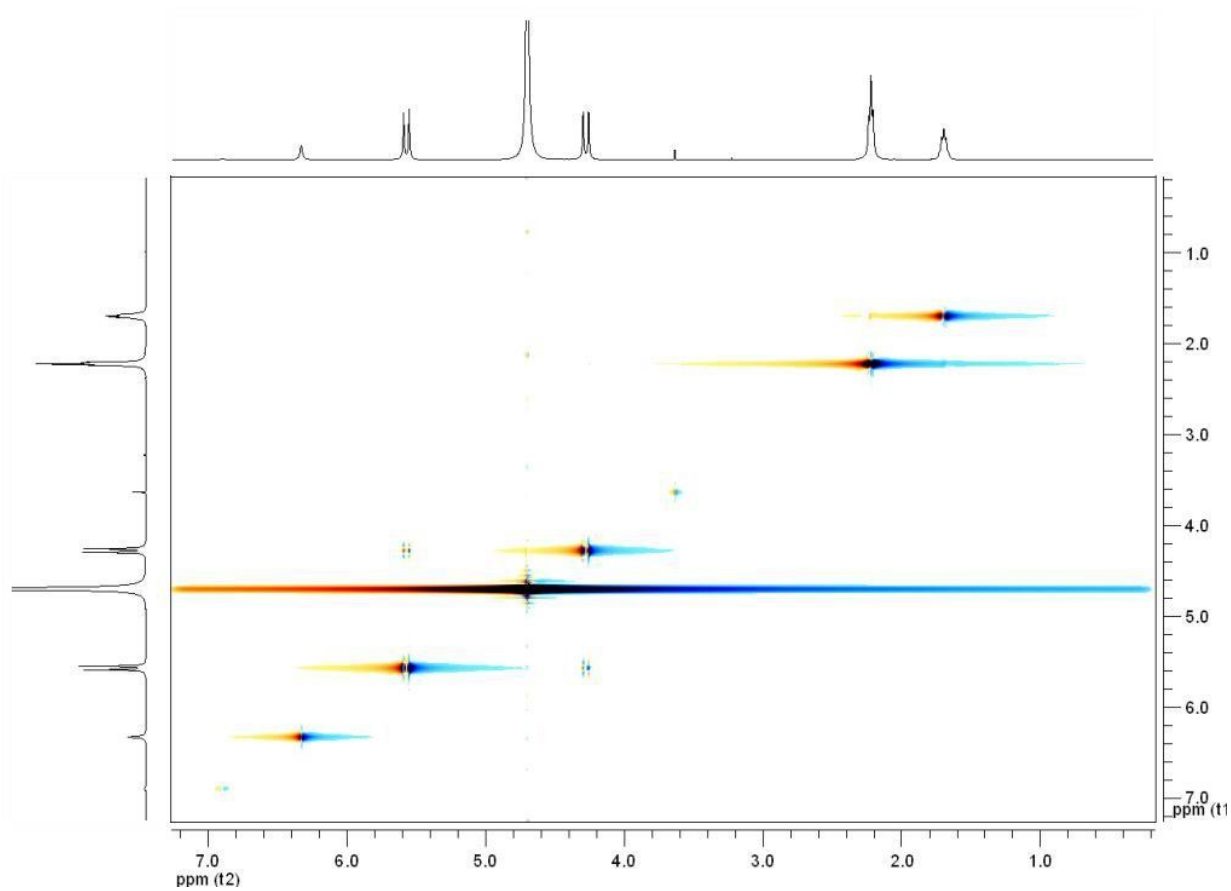

**S3. Structural comparison of normal and deformed CyP<sub>6</sub>Q[6] in compounds 7 and 8.**

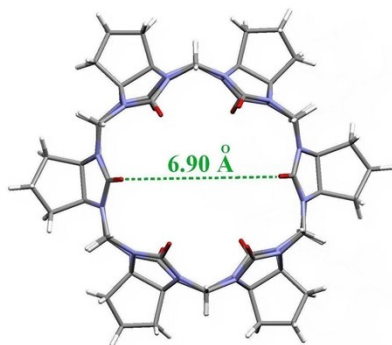

**normal CyP<sub>6</sub>Q[6]**

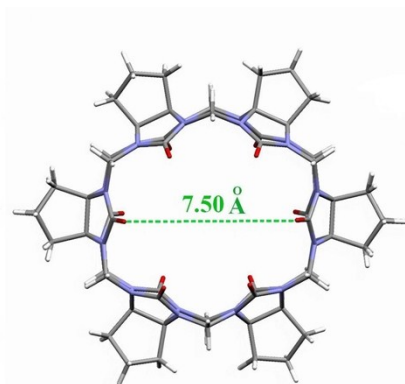

**deformed CyP<sub>6</sub>Q[6] in 7**

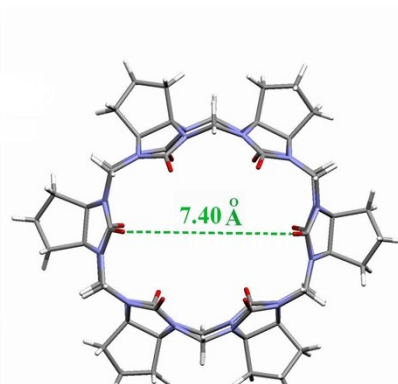

**deformed CyP<sub>6</sub>Q[6] in 8**
